# Supplementary material for: Erratum
Source: Oxford University Press journal article supplement (doi:10.1242/jeb.49.2.223), 1968-10-01
Supplement: jexbio_49_2_223a.pdf [file jexbio_49_2_223a.pdf]

## ERRATUM

CHASE, A. M., UNWIN, D. M. & BROWN, R. H. J. (1968). A simple electrolytic respirometer for the continuous recording of oxygen consumption under constant and natural conditions. *J. Exp. Biol.* **48**, 207-215.

Page 210. Figures 2 and 3. *For* Scale: 1 in *read* Scale:  $\frac{1}{4}$  in.
